# Supplementary material for: Temperature-dependent folding allows stable dimerization of secretory and virus-associated E proteins of Dengue and Zika viruses in mammalian cells
Source: PubMed Central journal article supplement (PMC5430527; doi:10.1038/s41598-017-01097-5), 2017-04-19
Supplement: 41598_2017_1097_MOESM1_ESM.pdf [file 41598_2017_1097_MOESM1_ESM.pdf]

# Supplementary Information

## **Temperature-dependent folding allows stable dimerization of secretory and virus-associated E proteins of Dengue and Zika viruses in mammalian cells**

J.L. Slon Campos<sup>a</sup>, S. Marchese<sup>a</sup>, J. Rana<sup>a</sup>, M. Mossenta<sup>a</sup>, M. Poggianella<sup>a</sup>, M. Bestagno<sup>a</sup>, O.R. Burrone<sup>a,\*</sup>

<sup>a</sup> Molecular Immunology Group, International Centre for Genetic Engineering and Biotechnology, 34149 Trieste, Italy

\* Address correspondence to Oscar R. Burrone, [burrone@icgeb.org](mailto:burrone@icgeb.org), tel: +39-040-3757314, Trieste, Italy.

## Supplementary Figure S1

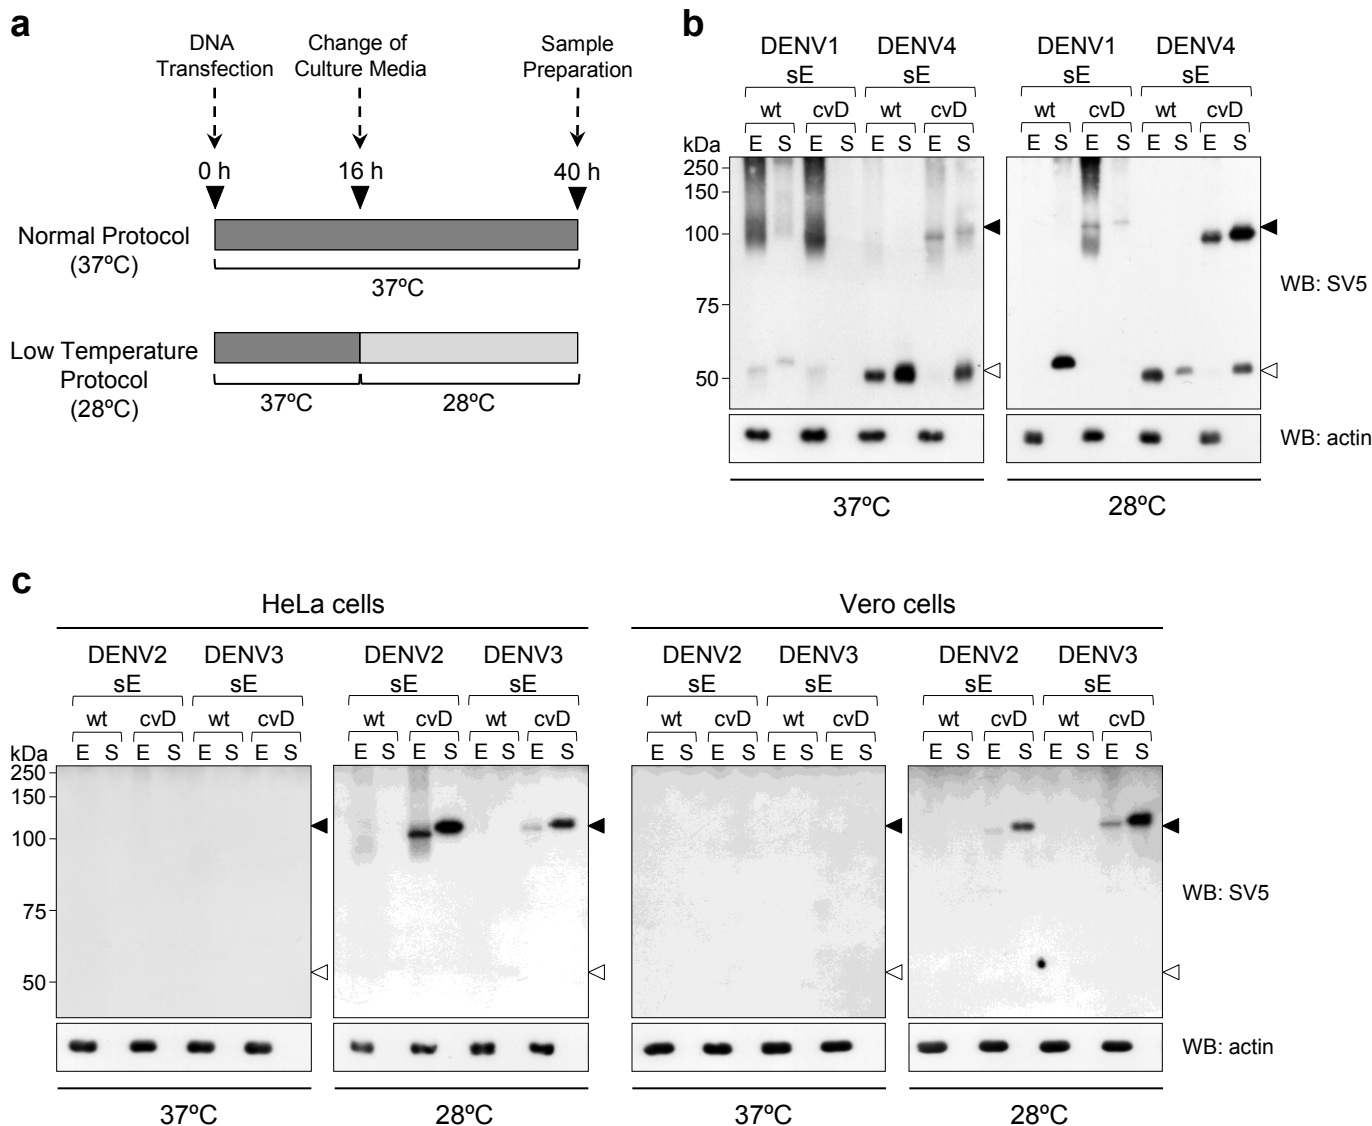

**Supplementary Figure S1. Dimerisation and secretion of sE proteins in mammalian cells.** **a)** Scheme of the experimental conditions after transfection and temperature shifts. **b)** Non-reducing western blots of total cell extracts (E) and culture supernatants (S) of HEK-293T cells transfected with sE-wt and sE-cvD constructs of DENV1 and DENV4, incubated at 37°C (left panel) or at 28°C (right panel). Open and filled arrowheads indicate monomeric and dimeric sE, respectively. **c)** Dimerisation and secretion of sE-wt and sE-cvD of DENV2 and DENV3 in HeLa (left) or Vero cells (right), incubated at 37°C or 28°C, as indicated.

## Supplementary Figure S2

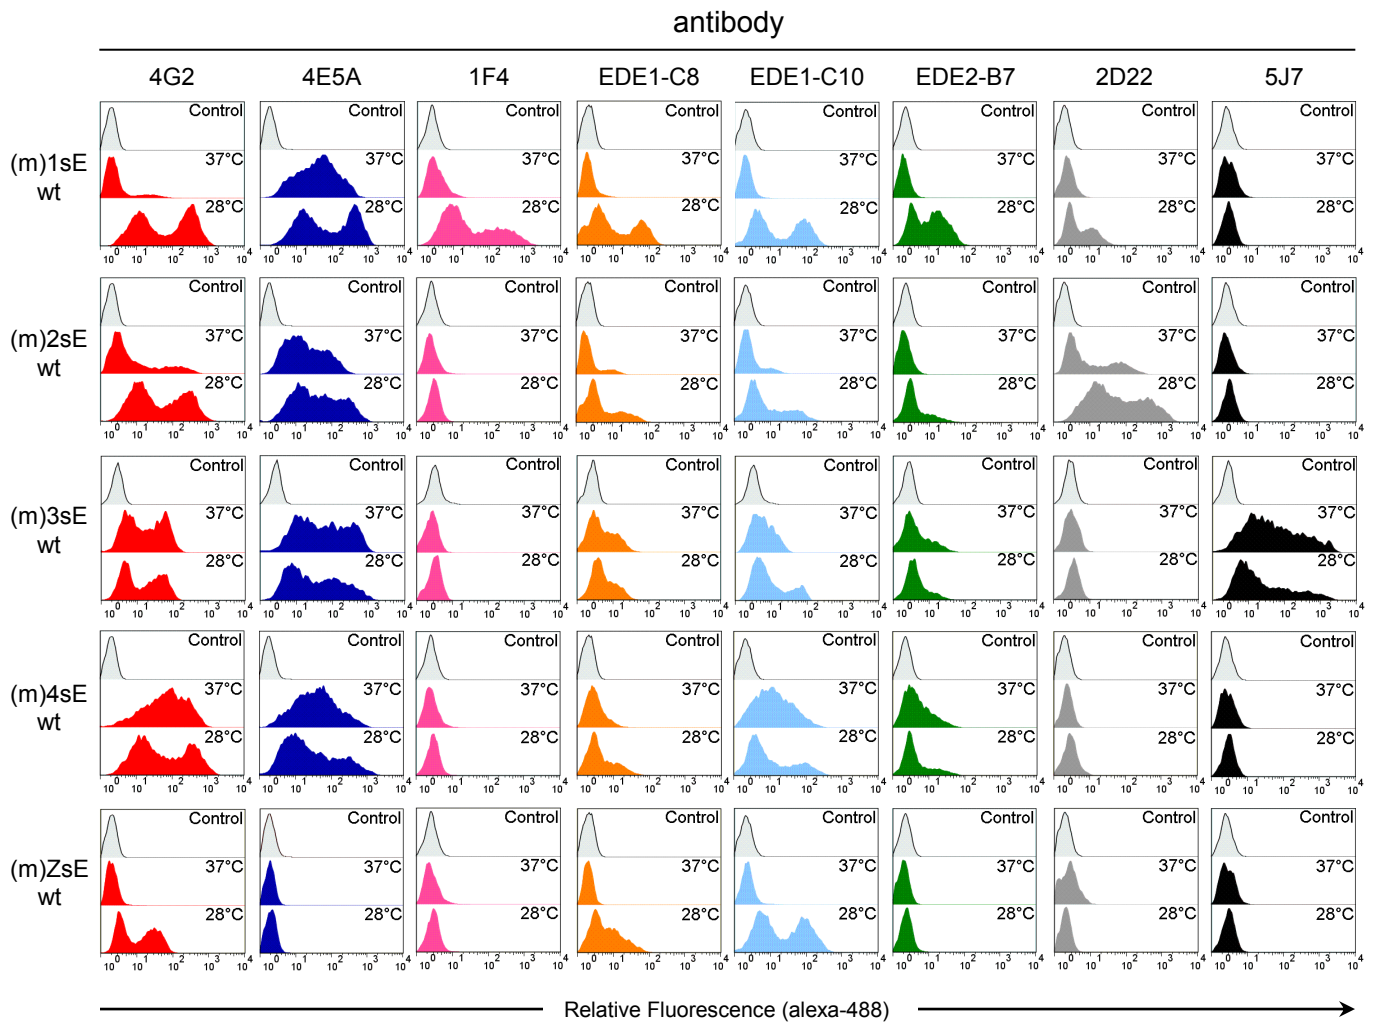

**Supplementary Figure S2. Structural analysis of sE-wt proteins from DENV and ZIKV.** Cytofluorimetric analysis of HEK-293T cells transfected with the membrane display sE-wt versions of all four DENV serotypes and ZIKV at 37°C or 28°C and reacted with the indicated mAbs. Mock-transfected HEK-293T cells incubated with each mAb served as controls.

## Supplementary Figure S3

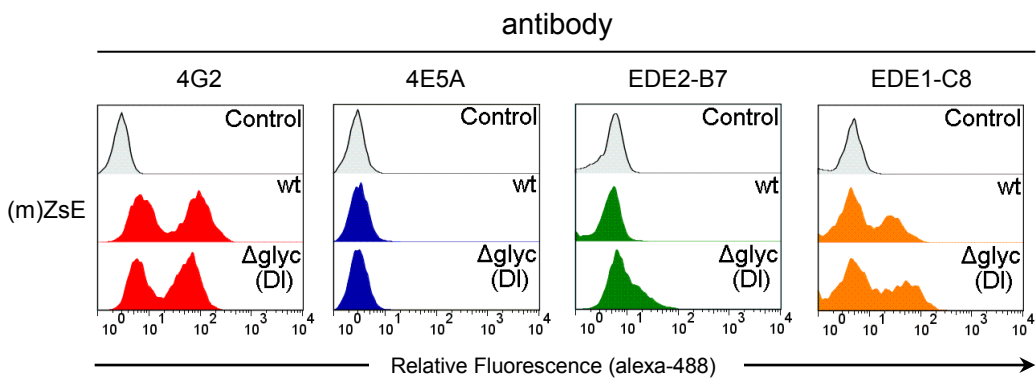

**Supplementary Figure S3. Effect of E glycosylation on EDE2 B7 reactivity.** Cytofluorimetric analysis of HEK-293T cells transfected at 28°C with the sE membrane display construct of ZIKV wt or the non-glycosylated mutant ( $\Delta$ glyc) on domain I (T156I), and reacted with the indicated mAbs. Mock-transfected HEK-293T cells incubated with each mAb served as controls.
